# Supplementary material for: FOXA1 Regulation Turns Benzamide HDACi Treatment Effect-Specific in BC, Promoting NIS Gene-Mediated Targeted Radioiodine Therapy
Source: PubMed Central journal article supplement (PMC7554325; doi:10.1016/j.omto.2020.08.015), 2020-08-29
Supplement: mmc1.pdf [file mmc1.pdf]

OMTO, Volume 19

## **Supplemental Information**

### **FOXA1 Regulation Turns Benzamide HDACi Treatment Effect-Specific in BC, Promoting NIS Gene-Mediated Targeted Radioiodine Therapy**

**Maitreyi Rathod, Madhura Kelkar, Snehal Valvi, Girish Salve, and Abhijit De**

## Supplementary methods:

### MTT cell toxicity assay:

To evaluate the IC-20, IC-30 concentrations of bHDACi, MCF-7, ZR-75-1 and ARO cells were seeded at a density of  $5 \times 10^3$ , in 96 well plates (Corning, USA), in triplicates. Cells were exposed to different concentrations of bHDACi for 48 hours. Cell viability was assessed using 10 $\mu$ l of 5mg/ml MTT (3-[4,5-dimethylthiazol-2-yl]c-2,5-diphenyltetrazolium bromide) (Sigma, USA) reagent, and absorbance measured at 570nm and 630nm.

### Measurement of $^{131}\text{I}$ uptake by Gamma Counter:

Mice from CI-994 treated and untreated groups were injected with 1mCi  $^{131}\text{I}$ . Day 1, day 3 and day 7 post  $^{131}\text{I}$  injection, the mice were dissected and the thyroid gland was isolated. The uptake of  $^{131}\text{I}$  from thyroid glands of CI-994+ $^{131}\text{I}$  and  $^{131}\text{I}$  alone groups, was measured by HIDEX-AMG Gamma counter.

### Cerenkov Luminescence Imaging:

CLI was performed using IVIS spectrum system. For *in vivo* Cerenkov imaging, animals in the  $^{131}\text{I}$  alone or AR-42/MS-275+ $^{131}\text{I}$  groups were injected with 1mCi of  $^{131}\text{I}$  intraperitoneally. Animals were placed in a light-tight chamber under isoflurane anaesthesia, and the luminescence scan was taken in open filter, F/Stop 1, subject height 1.5 cm.

### Bioinformatics analysis:

FOXA1 expression analysis from breast and thyroid cancer patient samples was done by cBioPortal using METABRIC data set, n=2509 for breast cancer cohort and Cell 2018 dataset, n=498 for thyroid cancer cohort [2-4].

## References:

1. West, A.C. and R.W. Johnstone, *New and emerging HDAC inhibitors for cancer treatment*. J Clin Invest, 2014. **124**(1): p. 30-9.
2. Cerami, E., et al., *The cBio cancer genomics portal: an open platform for exploring multidimensional cancer genomics data*. Cancer Discov, 2012. **2**(5): p. 401-4.
3. Pereira, B., et al., *The somatic mutation profiles of 2,433 breast cancers refines their genomic and transcriptomic landscapes*. Nat Commun, 2016. **7**: p. 11479.
4. Hoadley, K.A., et al., *Cell-of-Origin Patterns Dominate the Molecular Classification of 10,000 Tumors from 33 Types of Cancer*. Cell, 2018. **173**(2): p. 291-304 e6.

**Supplementary table 1 (ST1):** Table showing the different benzamide class HDAC inhibitors selected for the study [1]

| <b>Group</b> | <b>Candidate</b> | <b>HDAC targets</b>  | <b>Clinical Trial</b> | <b>Type of malignancy</b>                       |
|--------------|------------------|----------------------|-----------------------|-------------------------------------------------|
| Benzamide    | CI-994           | Class 1 HDAC         | Phase 2               | Pancreatic cancer                               |
|              | Chidamide        | Class1,2 HDAC        | Phase 2               | Solid tumours, lymphoma                         |
|              | MS-275           | Class 1<br>(HDAC1,3) | Phase 2/1             | Melanoma, Refractory solid tumours and lymphoma |
|              | AR-42            | Class1,2 HDAC        | Phase 1               | Haematological malignancies                     |
|              |                  |                      |                       |                                                 |

## Supplementary Figures

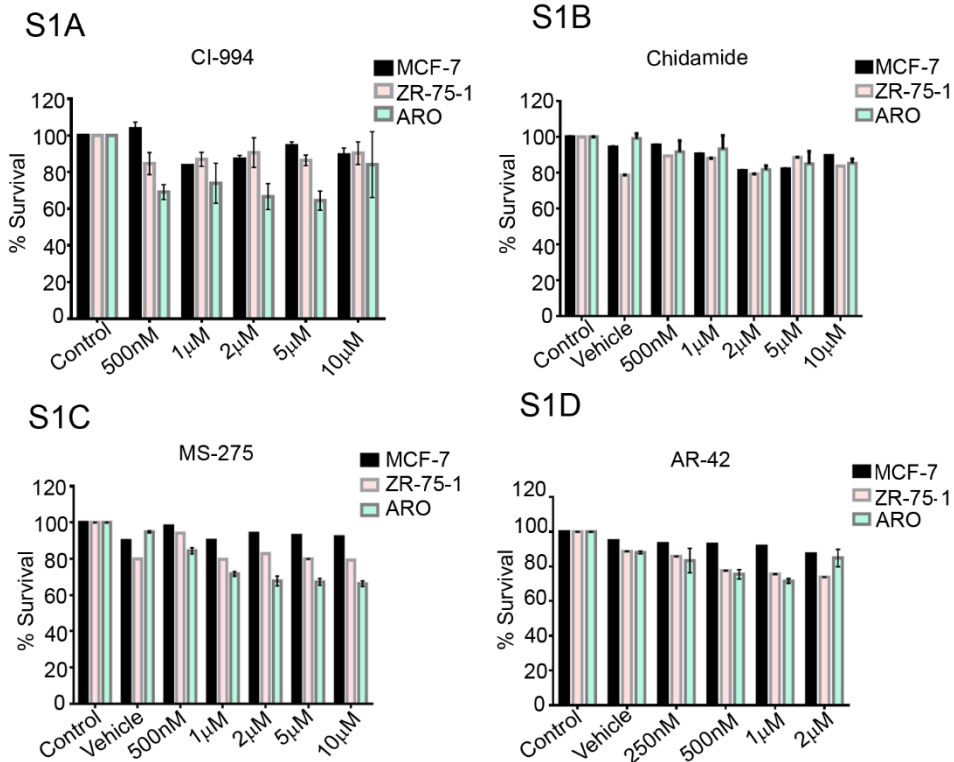

**Supplementary Figure 1: Benzamide class HDACi are non-toxic to MCF-7, ZR-75-1 and ARO cells. S1A-D:** Graphs showing the cytotoxicity profile of CI-994, Chidamide, MS-275 and AR-42 at different concentrations in MCF-7, ZR-75-1 and ARO cell lines. Y-axis shows percent survival fraction with respect to their untreated controls.

S2A

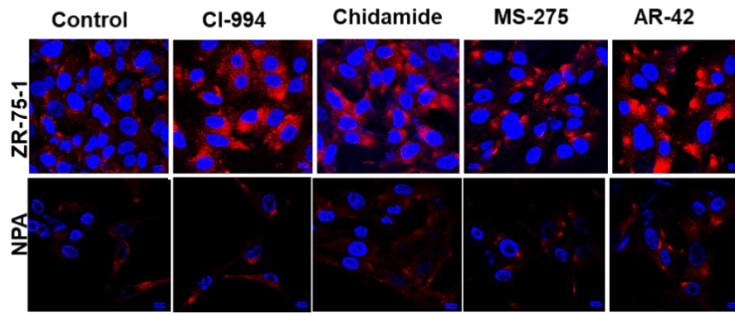

S2B

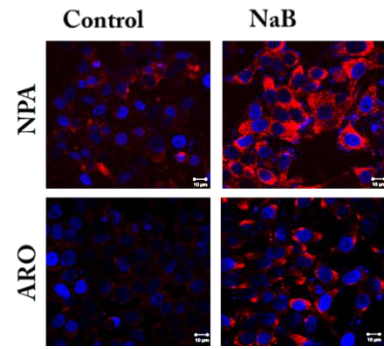

**Supplementary Figure 2: bHDACi enhance NIS expression in MCF-7 cells and sodium butyrate induces NIS in TC cells. S2A:** Immunofluorescence images showing NIS (red) expression in ZR-75-1 and NPA cells in response to bHDACi treatments. Blue indicates nucleus stained by DAPI. **S2B:** Immunofluorescence images showing enhanced NIS expression in ARO, NPA cells after sodium butyrate (NaB) treatment.

**S3A**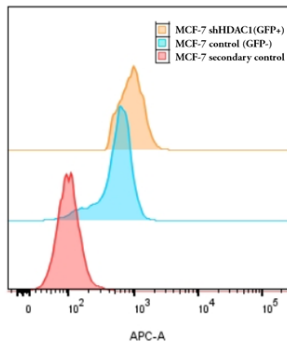**S3B**

| Sample        | Mean intensity |
|---------------|----------------|
| MCF-7 control | 697            |
| MCF-7 shHDAC1 | 1120           |

**Supplementary Figure 3: HDAC1 is a negative regulator of NIS expression in breast cancer.** **S3A:** Flow cytometry graph showing enhanced NIS expression after HDAC1 knockdown (MCF-7 shHDAC1-GFP+ve) which is the orange peak. The blue peak shows parental MCF-7 cells and red peak shows secondary control. **S3B:** Table showing the difference in the mean fluorescence intensity of NIS (APC channel) as quantified by flow cytometry.

S4A

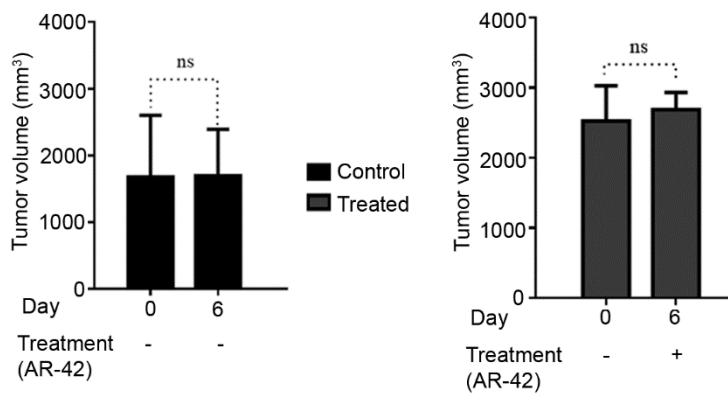

**Supplementary Figure 4: Sub optimal dose of AR-42 treatment has no effect on tumour volume. S4:** Charts showing tumour volume from control and treated mice. Tumour volumes were measured on day 0 (pre-treatment) and day 6 (post-treatment), as indicated on x-axis. ns stands for non-significant.

S5A

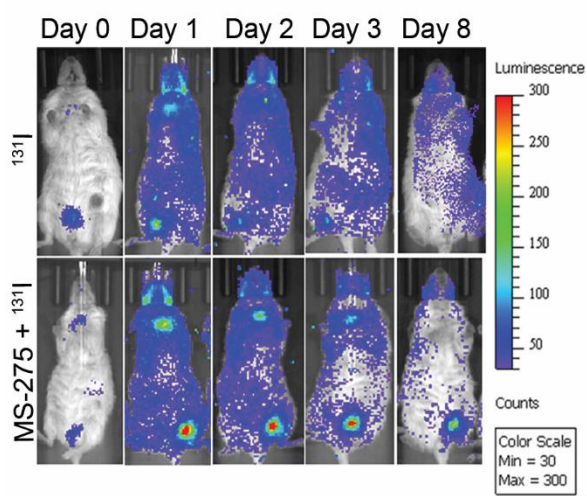

S5B

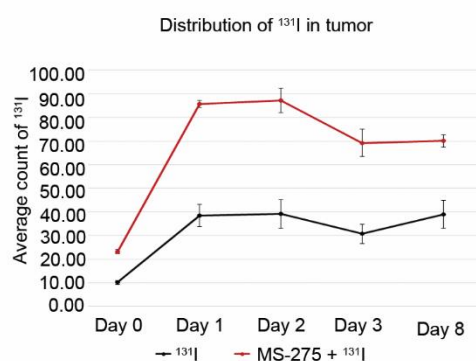

S5C

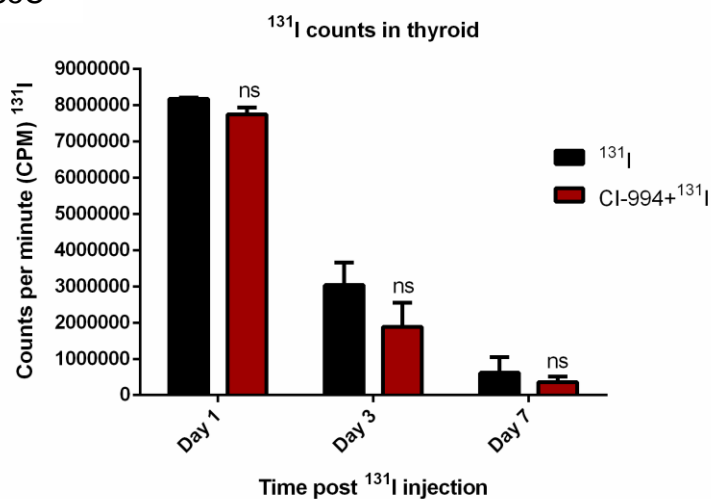

**Supplementary Figure 5: Cerenkov luminescence imaging showing higher accumulation of  $^{131}\text{I}$  in MS-275+  $^{131}\text{I}$  group. S5A: Mice images showing Cerenkov luminescence after  $^{131}\text{I}$  injection in  $^{131}\text{I}$  and MS-275+ $^{131}\text{I}$  groups. Scale bar shows the counts of Cerenkov luminescence output. S5B: Chart depicting the distribution of  $^{131}\text{I}$  in tumour. S5C: Graph indicating in vivo uptake of  $^{131}\text{I}$  in thyroid gland of  $^{131}\text{I}$  and CI-994+ $^{131}\text{I}$  groups. ns stands for non-significant.**



Factors predicted within a dissimilarity margin less or equal than 15% :

|                             |                       |                       |                                |                                  |                        |                        |                       |
|-----------------------------|-----------------------|-----------------------|--------------------------------|----------------------------------|------------------------|------------------------|-----------------------|
| 1 YY1 (T00915)              | 1 AhR:Arnt (T05394)   | 2 GR-beta (T01920)    | 3 C/EBPbeta (T00581)           | 4 C/EBPalpha (T00105)            | 5 GR-alpha (T00337)    | 6 EBF (T05427)         | 7 NBP-1 (T00902)      |
| 8 Egr-3 (T00243)            | 9 TFIIID (T00820)     | 10 SRY (T00997)       | 11 TCF-4E (T02878)             | 12 NF1CTF (T00094)               | 13 GR (T05076)         | 14 AP-2alphaA (T00035) | 15 Pax-5 (T00070)     |
| 16 p53 (T00671)             | 17 FOXP3 (T04280)     | 18 RXR-alpha (T01345) | 19 RAR-beta (T00721)           | 20 TFII-1 (T00824)               | 21 STAT4 (T01577)      | 22 c-Ets-1 (T00112)    | 23 NDR (T00885)       |
| 24 PXR-1/RXR-alpha (T05671) | 25 c-Jun (T00133)     | 26 COUP-TF1 (T00149)  | 27 RAR-beta/RXR-alpha (T05420) | 28 NF-1 (T00539)                 | 29 ER-alpha (T00261)   | 30 RAR-alpha1 (T00719) | 31 STAT1beta (T01573) |
| 32 E2F-1 (T01542)           | 33 HNF-1C (T01951)    | 34 HNF-1B (T01950)    | 35 E1F (T00270)                | 36 ENKTF-1 (T00255)              | 37 c-Myb (T00137)      | 38 GATA-1 (T00306)     | 39 IRF-2 (T01491)     |
| 40 c-Ets-2 (T00113)         | 41 HNF-3alpha (T0251) | 42 IRF-1 (T00423)     | 43 NF-AT1 (T00550)             | 44 PPAR-alpha/RXR-alpha (T05221) | 45 Elk-1 (T00250)      | 46 LEF-1 (T02905)      | 47 TCF-4 (T02918)     |
| 49 NF-AT2 (T01945)          | 48 RelA (T00594)      | 49 USF2 (T00878)      | 50 PR.B (T00696)               | 51 PR.A (T01661)                 | 52 MAZ (T00490)        | 53 GATA-3 (T00311)     | 54 AR (T00040)        |
| 56 Sp1 (T00759)             | 57 NF-Y (T00150)      | 58 T3R-beta1 (T00851) | 59 PEA3 (T00685)               | 60 GATA-2 (T00308)               | 61 HNF-4alpha (T03828) | 62 MEF-2A (T01005)     | 63 CTF (T00174)       |
| 64 AhR (T01795)             | 65 STAT5A (T04683)    | 66 Ik-1 (T02702)      | 67 HOXD9 (T01424)              | 68 HOXD10 (T01425)               |                        |                        |                       |

**Supplementary Figure 6: HNF3 alpha (FOXA1) has putative binding sites on NIS promoter.** Image showing the putative transcription factors that bind to NIS promoter with 15% dissimilarity range, as predicted by promo software. HNF3-alpha (FOXA1) is highlighted in red box.

s7

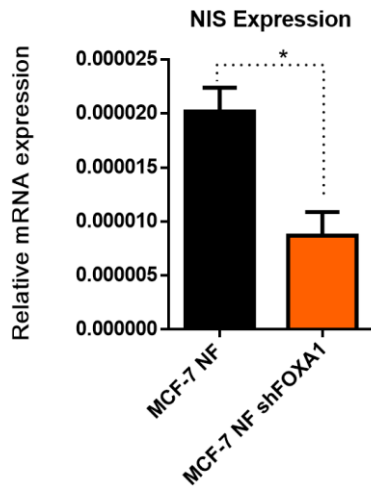

**Supplementary Figure 7: Depletion of FOXA1 in MCF-7 cells leads to a decrease in NIS transcription.** Graph showing relative mRNA expression of NIS. Error bar indicates SEM. \* indicates  $p \leq 0.05$ .

S8

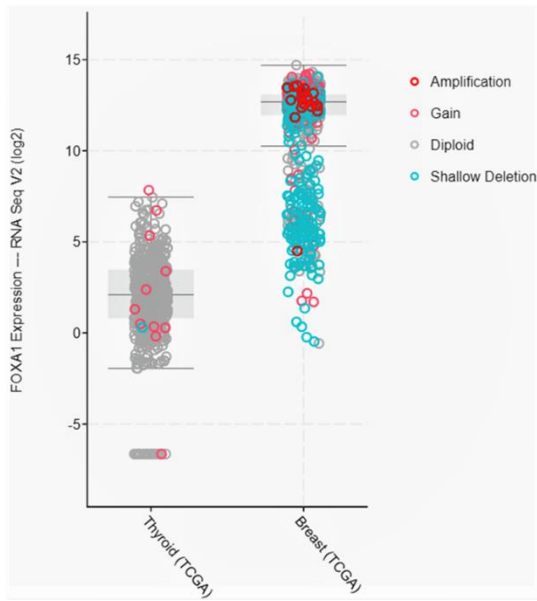

**Supplementary Figure 8: FOXA1 expression is higher in breast cancer patients as compared to thyroid cancer patients.** Retrospective analysis from TCGA data set showing differential expression of FOXA1 across breast and thyroid cancer patients.
